# Supplementary material for: A Mindfulness-Based Intervention to Reduce Altered Brain Reward Function in Cannabis Use Disorder: A Double-Blind, Active and Passive, Randomised Controlled fMRI Trial
Source: Research Square preprint supplement (doi:10.21203/rs.3.rs-8283090/v1), 2025-12-16
Supplement: Supplementary file 1 [file 20cfb0c8a7a7ed354e708a0e.docx]

**Supplementary Data**

1. **Supplementary Experimental Procedure**
   1. **Participants’ Selection Criteria**
      1. ***Inclusion Criteria***

*Inclusion criteria for all participants were:* i) age *18-to-55* years; ii) fluency in English; iii) normal to corrected vision; iv) meeting MRI safety criteria; v) able to attend sessions at the Monash Biomedical Imaging facility.

*Inclusion criteria for the CUD group were:* i) had used cannabis daily-to-almost daily for ≥ 12 months; ii) attempt to quit cannabis use at least once in the last 12 months; iii) endorse DSM-5 criteria for moderate-to-severe CUD, defined as four or more symptoms, confirmed by the Structured Clinical Interview for DSM-5 (SCID-5-RV (First et al., 2015)).

- - 1. **Exclusion Criteria**

*Exclusion criteria for all participants were*: i) significant medical conditions, history of acquired brain injury or loss of consciousness (e.g., > 5 minutes); ii) neurological disorders (e.g., stroke, epilepsy); iii) current suicidal ideation or any diagnosed psychiatric disorders confirmed by the Mini International Neuropsychiatric Interview [MINI] (Sheehan et al., 1994) except for low-to-moderate depression/anxiety that is highly entrenched with CUD; iv) illicit substance use (other than tobacco/alcohol) above recreational levels (i.e., greater than 50-lifetime episodes, or > weekly use over 3-months (other than cannabis in the CUD group), v) illicit substance 4 weeks before testing (other than cannabis in CUD group); vi) illicit substance and alcohol use 12-hours prior to testing; vii) significant alcohol use of scores ≥ 13 measured via the Alcohol Use Identification Test scores (AUDIT; (Babor et al., 2001)); viii) use of prescribed medication affecting the central nervous system (except for antidepressant – e.g., selective serotonin reuptake inhibitors); ix) presence of MRI contradictions (e.g., pacemaker) confirmed by a screener from the testing facility; x) currently breastfeeding or pregnant; xi) intelligence quotient score < 80 as per Wechsler Abbreviated Scale of Intelligence – second edition (WASI-II; (Wechsler, 2018), and xii) regular mindfulness or relaxation experience (i.e., > 10 lifetime occasions in past year). *Exclusion criteria for the control group were:* i) no use of cannabis in the 12 months prior to testing.

As a result of the inclusion/exclusion process, 22 participants were excluded due to: i) IQ below 80 (*n* = 1); missing neuroimaging data for the MID task (*n* = 3); ii) fMRI head movement issues *n* = 6); iii) neurological disorders (*n* = 1); iv) incidental finding (*n* = 2); v) recent use of substances other than cannabis (*n* = 1), vi) synthetic cannabis use (*n* = 1), vii) lost to follow-up (*n* = 7).

- 1. **Testing Measures**

All socio-demographic variables were measured at baseline pre-intervention, including participants’ age, biological sex (male/female), and years of completed education. IQ was measured using the Weschler Abbreviated Standardised Intelligence - II (WASI-II; (Wechsler, 2018). Handedness was measured using the Edinburgh Handedness Inventory – Short Form (EHI-SF; (Veale, 2014). The tools used to characterise samples’ substance use and psychopathology are outlined below.

- - 1. **Substance Use Measures**
    2. ***Levels of SUD Severity***

Pre-intervention, CUDseverity was confirmed via the Structured Clinical Interview for DSM-5 Research Version (SCID-5-RV; (First et al., 2015) and alcohol dependency via the Alcohol Use Disorder Identification Test (AUDIT; (Babor et al., 2001). Pre-to-post intervention (baseline and follow-up assessments), the Cannabis Use Identification Test (CUDIT; (Marshall, 2013) was used to measure cannabis severity. The Cannabis Withdrawal Scale (CWS; (Allsop et al., 2011) was used to measure participants' withdrawal during the past 24 hours, with higher scores representing greater cannabis withdrawal. Additionally, nicotine dependency was measured via the Fagerström Test for Nicotine Dependence (FTND; Fagerström et al., 2012).

- - 1. ***Exposure to other/current substances***

The Timeline Follow-Back (TLFB; (Sobell & Sobell, 1992) was used to measure participants' substance use exposure pre-to-post intervention. We recorded the quantity and days of participants’ substance use in the past month and the past two weeks. The following variables were extracted: cannabis dose (i.e., grams/past month and past two weeks), cannabis use frequency (i.e., days/past month and past two weeks), alcohol dose (i.e., standard drinks/ past month), alcohol use frequency (i.e., days/month), tobacco use frequency (i.e., days/ past month), tobacco dose (i.e., cigarettes/month).

The onset and duration of regular use (i.e., > 1 time monthly) and the age of the first cannabis try were assessed via a semi-structured interview used by our extended team (Lorenzetti et al., 2015; Solowij et al., 2002; Yucel et al., 2008).

The Marijuana Ladder (Slavet et al., 2006) was used pre-intervention to measure participants' motivation to stop consuming cannabis and their desire/readiness to change. Scores ranged from 0 “No thought about quitting, I cannot live without cannabis” to 9 “I have changed my cannabis use, but I still worry about slipping back, so I need to keep working on the changes I have made”. Additionally, the five stages of motivation to change correspond to one of those scores. *The pre-contemplation stage* = a score of 0-2; *the contemplation stage* = a score of 3-5; *the preparation stage* = a score of 6-7; *the action stage* = a score of 8; and *the maintenance stage* = a score of 9.

- - 1. ***Psychopathology***

Psychopathology symptoms were measured pre-to-post intervention by using the Beck Depression Index - II (BDI-II; (Beck et al., 1996) questionnaire, which is a 21-item standardised tool that measures depression symptoms over the past fortnight. Stress levels were measured using the Perceived Stress Scale (PSS; (Cohen et al., 1983), and state anxiety was assessed using the Spielberger State-Trait Anxiety Index – Y (STAI-Y; (Spielberger, 2012). Higher scores on these measures indicate more severe symptoms.

- - 1. ***Mindfulness***

Mindfulness was measured pre-to-post intervention using the Five-Factor Mindfulness Questionnaire (FFMQ; (Baer et al., 2008), which is a 39-item self-report questionnaire that measures mindfulness on a 5-point Likert Scale. The five factors include: i) observing, ii) describing, iii) acting with awareness, iv) non-judging of inner experience, and v) non-reactivity to inner experience. Additionally, the Toronto Mindfulness Scale (TMS; (Lau et al., 2006) was used to measure "state-like" experiences pre-to-post mindfulness audio recording on a 42-item Likert scale rated on a 5-point scale.Highter scores on these measures indicate greater mindfulness/state-like experiences.

- - 1. ***Relaxation***

Relaxation was measured using a Visual Analogue Scale (VAS) pre-to-post mindfulness audio recording to assess subject relaxation. Responses were recorded on a 10-point Likert scale (1 = not relaxed, 10 = very relaxed). Higher scores represent greater relaxation.

- 1. **Intervention Protocol**

Prior to the intervention, participants were randomly assigned to one of three conditions: i) MBI, ii) relaxation condition, or iii) no intervention. Using headphones, both groups (MBI and relaxation condition) listened to a 7-minute track. The mindfulness group listened to mindfulness scripts, while the relaxation group listened to relaxation scripts (as used previously in hazardous drinkers (Kamboj et al., 2017) and adapted for cannabis). The third group was a passive placebo; thus, they did not receive an intervention; however, all three groups were instructed to complete a daily questionnaire measuring cannabis use/craving. Participants completed the three intervention conditions over a 2-week period. The session concluded with a debriefing of the participants, who were provided with direct instructions on how and when to practice the intervention. The unblinded tester provided a link to complete the intervention online (Qualtrics XM) or via USB.

- - 1. ***Intervention Compliance***

An unblinded tester monitored compliance with the interventions (MBI and relaxation conditions) daily for approximately two weeks to determine if the participants had accessed their daily task via the Qualtrics link. When participants missed one to two days, an SMS was sent to them. Additionally, a phone call was made when participants missed three consecutive days.

- 1. **Audio Scripts for the MBI and Relaxation Groups**
     1. ***Relaxation Script***

The relaxation script informed participants that the way to gain control over cravings is to reduce their intensity by “softening their muscles, releasing bodily tension, and calming and unwinding the mind”. This transformation of sensations allowed participants to have less unpleasant, more calming experiences (Table 1).

- - 1. ***Mindfulness Script***

Contrary to the relaxation script, the mindfulness script did not refer to reducing, transforming or controlling cravings or inner experiences. The objective was to be alert and attentive, not simply relax. “Open monitoring” of experience and awareness of feelings, bodily sensations, and cravings was emphasised. The script informed participants to “observe bodily sensations in the body as momentary events”. This allowed participants to “notice bodily sensations and not react”. To minimise expectancy effects, the terms “mindfulness” and “relaxation” were not mentioned in any experimental or recruitment materials (Table 1).

**Table 1.** *Outline of Audio Scripts for MBI and Relaxation Groups*

**Part A**

| **TRACK 1/3 (A & B) 3 MIN 40 SEC** | | | |
| --- | --- | --- | --- |
| **MBI**  **TRACK 1_A** | **Relaxation**  **TRACK 1_B** | | |
| **Introduction about 30 sec** | | | |
| In this recording you will learn about a strategy for managing craving or urges to smoke cannabis. [2 sec] This strategy can be used whenever you experience a difficult feeling, but here we are thinking specifically about how to manage craving for cannabis. [2 sec] First there will be an explanation about what this strategy involves [1 sec] and then you’ll have a chance to practice it briefly before the main task. [3 sec] | In this recording you will learn about a strategy for managing craving or urges to smoke cannabis. [2 sec] This strategy can be used whenever you experience a difficult feeling, but here we are thinking specifically about how to manage craving for cannabis. [2 sec] First there will be an explanation about what this strategy involves [1 sec] and then you’ll have a chance to practice it briefly before the main task. [3 sec] | | |
| **“An explanation of the strategy” [about 3 min]** | | | |
| When we notice a strong desire for something, like a favourite food or drink or drug, especially if it’s right in front of us, it is often the case that we will simply consume it without too much thought. This is a kind of automatic response. We do not notice how full or hungry we are but just respond to stimuli automatically. [2 sec]  A similar thing can happen with cannabis, leading to over-consumption and occasionally, to more serious problems related to smoking cannabis. [2 sec] We may be responding automatically to external events, such as seeing someone smoking cannabis, or we may be responding automatically to internal negative feelings in our bodies. [3 sec] | | When we notice a strong desire for something, like a favourite food or drink or drug, especially if it’s right in front of us, it is often the case that we will simply consume it without too much thought. This is a kind of automatic response. We do not notice how full or hungry we are but just respond to stimuli automatically. [2 sec]  A similar thing can happen with cannabis, leading to over-consumption and occasionally to more serious problems related to smoking cannabis. [2 sec] We may be responding automatically to external events such as seeing someone smoking cannabis, or we may be responding automatically to internal negative feelings in our bodies. [3 sec] | |
| A craving or urge to smoke cannabis is generally experienced as a feeling in the body, that can be accompanied by thoughts like “I could really do with a smoke right now”. Craving is often related to stress and negative feelings, like anxiety. Experiencing craving, stress and uncomfortable bodily sensations, can lead to automatic smoking. [4 sec]  **Being in touch with and aware of your thoughts, feelings and bodily sensations** - can help you **experience cravings in a different way**. [4 sec]  **Noticing your thoughts, and what sensations are currently being felt in your body can help you experience craving as a temporary event in the body.** [2 sec]  **Paying attention to the exact experiences and processes, that are going through your body and mind, can help you tolerate** your cravings, without having to act on them. [2 sec] | | A craving or urge to smoke cannabis is generally experienced as a feeling in the body, that can be accompanied by thoughts like “I could really do with a smoke right now”. Craving is often related to stress and negative feelings, like anxiety. Experiencing craving, stress and uncomfortable bodily sensations, can lead to automatic smoking. [4 sec]  **Softening the muscles in your body - and calming and unwinding your mind** - can help you **reduce your** craving. [4 sec]  **Releasing tension in your body can help you reduce the intensity of your cravings by helping you experience them less intensely in the body.** [2 sec]  **Easing-up and de-stressing the tense feelings in your body, and reaching a state of tranquillity, can help you to control the** intensity of your cravings, reducing the need to act on them. [2 sec] | |
| **TRACK 1/3 (A & B) 3 MIN 40 SEC** | | | |
| **MBI**  **TRACK 1_A** | **Relaxation**  **TRACK 1_B** | | |
| **“An explanation of the strategy” [about 3 min]** | | | |
| **(continued)** | | | |
| Some people find that **noticing, paying attention to, and accepting** what’s going on inside their minds and bodies, **without trying to change these experiences** – can help them **experience cravings, in a different way** – in a way that does not automatically lead to smoking. [3 sec] | | Some people find that **calming** and unwinding what’s going on inside their minds **and releasing and easing up the tension from their bodies** - can help them to **reduce their craving levels -** in a way that does not automatically lead to smoking. [3 sec] | |
| The main benefits of **noticing and being aware of your thoughts and bodily sensations,** are believed to lie, in a greater ability to **understand** that unpleasant, thoughts and feelings **come and go, like clouds in the sky**. [2 sec]  You begin to **realise that you do not have to get caught up in them – you can just allow** unpleasant thoughts and feelings**,** to **come, to stay for as long as they will**, and eventually begin to experience them in a different way. [1 sec] | | The main benefits of **calming down, and de-stressing your mind and releasing the tension in your body,** are believed to lie in a greater ability to calm and **reduce** strong, unpleasant, **or unwanted** feelings**, sensations** and thoughts that arise. [2 sec]  You begin to **develop the ability to deliberately release tension from your body and to calm down your mind, and find, that with practice, these** unpleasant feelings, sensations, and thoughts will gradually change**,** and **decrease**, and eventually**,** they may even disappear. [1 sec] | |
| The key thing is **allowing** yourself to **fully experience** bodily reactions, and thoughts, **without trying to get rid of them**, and without automatically reacting to them. [1 sec] This can be achieved by the simple method, of **observing** your thoughts and feelings, **with curiosity**, **without analysing or judging them.** [3 sec] This leads to **greater acceptance** of difficult experiences and the ability to respond to them more purposefully. | | The key thing is **transforming** your bodily reactions, emotions, and thoughts, **to more calming experiences so that they are less unpleasant**,so you do not have to automatically respond to them. [1 sec] This can be achieved by the simple method of **soothing** your thoughts, and **loosening up**, **any tension from your muscles.** [3 sec] This leads to difficult thoughts, feelings, and sensations **changing into less unpleasant ones.** | |
|  | | | |
| **TRACK 2/3 (A & B) 3 MIN 59 SEC**  **Strategy practice** | | | |
| **MBI**  **TRACK_2A** | | **Relaxation**  **TRACK_2B** | |
| [1 sec] Let’s see how this approach might work in practice.  Start by letting your eyes gently close or fix them on the floor in front of you. Take a moment and **notice the sensations of sitting on the chair. [1 sec]** **Maybe notice the parts of your body in contact with the chair**. [pause 3 sec]  **Notice the sensations in those parts of** your body. [2 sec] **Notice the sensations in** your legs and in your feet, where they make contact with your shoes, and the floor [pause 5 seconds]. **Notice sensations** in other parts of your body. **[pause 5 sec]**. | | [1 sec] Let’s see how this approach might work in practice.  Start by letting your eyes gently close or fix them on the floor in front of you. Take a moment **to adopt a calm state of mind and a relaxed posture.** **[1 sec]** **Make sure you are sitting in a comfortable position in the chair and relax and unwind your mind**. [pause 3 sec]  **Loosen up any stiffness that you feel** in your body. [2 sec] **Start by releasing tension** **from the muscles** in your legs and feet and then **ease and soften** other parts in your body [pause 5 seconds]. | |
| **TRACK 2/3 (A & B) 3 MIN 59 SEC**  **Strategy practice** | | | |
| **MBI**  **TRACK_2A** | | **Relaxation**  **TRACK_2B** | |
| **(continued)** | | | |
| *Now imagine that you have cannabis with you: your favourite kind of cannabis. Imagine that your favourite kind of cannabis is in front of you. Concentrate fully on this image, get caught up in it, bring it to life as if it’s right in front of you, and give it your full attention.*  *Imagine holding the cannabis; it’s as if it’s really there. Imagine the smell. Now imagine preparing it so you can smoke it. And now imagine getting ready to smoke it. Bring it to your lips, and breathe it in [1 sec], inhaling deeply. Sense how it feels to smoke it, feeling it in your chest [pause] and the taste in your mouth. Inhale it, and exhale. Immerse yourself in this experience and the different sensations [3 sec].* | | *Now imagine that you have cannabis with you: your favourite kind of cannabis. Imagine that your favourite kind of cannabis is in front of you. Concentrate fully on this image, get caught up in it, bring it to life as if it’s right in front of you, and give it your full attention.*  *Imagine holding the cannabis; it’s as if it’s really there. Imagine the smell. Now imagine preparing it so you can smoke it. And now imagine getting ready to smoke it. Bring it to your lips, and breathe it in [1 sec], inhaling deeply. Sense how it feels to smoke it, feeling it in your chest [pause] and the taste in your mouth. Inhale it, and exhale. Immerse yourself in this experience and the different sensations [3 sec].* | |
| As you keep this image in mind you, may notice some craving or urges to smoke. [2 sec] As you **notice** these feelings, focus your **attention inward,** on those feelings. Allow your **attention to scan the sensations throughout your body.** [3 sec]  **Notice** where in your body you experience the craving, or any difficult feeling, and **what the sensations are like**. **Notice** fully each area in your body where you experience the urge and simply tell yourself **what you are experiencing**. For example, you might say, “**I feel my craving**, **in my abdomen”**, **or**, **“I feel my craving**, **in my chest”.**  **Focus** on the area in your body where you are experiencing the craving most strongly. **Notice the exact sensations in that area. [1 sec] How does it feel? Is it hot, cold, tingly, or numb? Perhaps there is another word to describe the feeling, that you are noticing? [1 sec] Are your muscles tense or relaxed? [1 sec] How large an area of your body is involved?** **[1 sec]**  **Notice the craving sensations, stay with them, and describe them to yourself**. [pause 5 sec] **Notice how the sensations change in your body: how they change in shape or location, or intensity. [1 sec] Do not struggle against the feelings; allow yourself to experience them and follow the way they shift and change.**  [3 sec] | | As you keep this image in mind you, may start feeling craving and urges to smoke. [2 sec] As you **have** these feelings, focus on **calming your body**. Allow your **body to feel more and more loose and at ease.** [3 sec]  As you experience craving, or any difficult feeling in your body, **just loosen and untense your muscle**s and allow yourself to relax fully. When you experience an urge, simply tell yourself **to relax and think relaxing thoughts**. For example, you might say, **“I am managing my craving**, **by relaxing my muscles”**, **or**, **“I am managing my craving**, **by calming my mind”.**  Try to **relax** the area in your body where you are experiencing the craving most strongly. **Start by taking a few slow deep breaths…..** **[1 sec] Slowly breathe in through your nostrils and breathe out from your mouth.** **[1 sec] As you breathe out, release any tension that you may be experiencing. [1 sec] Allow the muscles to feel more and more loose and relaxed in other parts of your body.** **[1 sec]**  **Calm each area where you experience craving,** [pause 5 sec]. **Continue to take slow and deep breaths… As you breathe out unwinding your mind, and releasing any further tension, felt in your body. [1 sec] Allow any feelings, to change to more calming and less unpleasant ones.** [3 sec] | |
| **TRACK 2/3 (A & B) 3 MIN 59 SEC**  **Strategy practice** | | | |
| **MBI**  **TRACK_2A** | | **MBI**  **TRACK_2A** | |
| **(continued)** | | | |
| The purpose of this exercise is **not to make the craving go away**, **but to experience craving**, **in a different way**, **and learn that these feelings can be accepted**, **and tolerated**, **rather than acted upon**. [**16 sec silence till the end]** | | The purpose of this exercise **is to reduce the craving**, **and change the unpleasant experience of the craving**, **into a less unpleasant one, through releasing tension in the muscles**, **and calming and unwinding the mind**. [**16 sec silence till the end]** | |
|  | | | |
| **TRACK 3/3 (A & B) 7 MIN 20 SEC**  **Main task/main strategy practice** | | | |
| **MBI**  **TRACK_3A** | | | **Relaxation**  **TRACK_3B** |
| Now we are going to practice the strategy again with a bit more detail and depth.  While doing this exercise, your attention will probably wander from time to time. In fact, this is quite normal, and it may happen repeatedly **but try not to get caught up in these different, unrelated thoughts**. pause]. **Each time you notice your mind wandering; take a second to notice this and bring yourself back to the present experience of thoughts, feelings, and sensations** [pause 5 seconds]. | | | Now we are going to practice the strategy again with a bit more detail and depth.  While doing this exercise, your attention will probably wander from time to time. In fact, this is quite normal, and it may happen repeatedly, **but try not to get too distracted and continue to calm the mind** [pause]. **Just allow your body to continue to be relaxed by softening any tension and by letting your mind to continue to unwind and slow down** [pause 5 seconds]. |
| To start, let your eyes gently close, or fix them on a point in front of you. Try to sit in a way that ensures that you are **awake and alert**. The idea is not necessarily to **become relaxed.** The main idea is to be **awake and attentive** to fully notice and focus on what you experience in your body and mind. This will enable you to **learn how to experience craving without reacting to it**. | | | To start, let your eyes gently close, or fix them on a point in front of you. Try to sit in a way that ensures that you are **comfortable and tranquil**. The main idea is to learn how to deliberately **become relaxed, calm, and at ease**. This will enable you to fully **release tension from your body and unwind your mind, so that you can change how you experience cravings and reduce the intensity of them**. |
| As before, take a moment now to **notice the sensation of sitting in the chair** [pause]. Start **to notice where each part of your body touches the chair and feel your feet on the ground** [pause 5 seconds]. | | | As before, take a moment now to **adopt a calm state of mind** [pause]. **Make sure you sit in a comfortable position in the chair and relax any tension that you feel in your body** [pause 5 seconds]. |
| Now take a slow and deep breath and **direct your attention to focus on the physical sensations of your breath** [pause 5 seconds]. You don't need to do anything special with your breathing. Simply **notice the rise and fall of your chest or abdomen as you breathe in through your nose and gently breathe out.** [pause 5 seconds]. As you breathe in **notice** the cool air coming into… | | | Now take a slow and deep breath. **As you breathe in, naturally allow your belly to rise, and to fall, as you breathe out, making sure that it feels comfortable** [pause 5 seconds]. B**reathe in through your nose and gently breathe out.** [pause 5 seconds.] **Feel relaxed and calm through your body and mind**. |
| **TRACK 3/3 (A & B) 7 MIN 20 SEC**  **Main task/main strategy practice** | | | |
| **MBI**  **TRACK_3A** | | | **Relaxation**  **TRACK_3B** |
| **(continued)** | | | |
| …your nostrils [pause], and the warm air as you breathe out. | | | **Breathe in through your nose and gently breathe out.**  **Feel calm** as you breathe in [pause], and feel any tension leave as you breathe out. |
| *Now again, imagine that you have your favourite kind of cannabis with you. Imagine holding the cannabis; as if it’s really there. Imagine the smell.. Now imagine preparing it so you can smoke it. And now imagine that it is ready to smoke, and that now you are getting ready to smoke it. Bring it to your lips, and breathe it in [1 sec], inhaling deeply. Sense how it feels to smoke it, feeling it in your chest [pause] and the taste in your mouth. Inhale it, [1 sec] and exhale it. Immerse yourself in this experience and the different sensations [3 sec].* | | | *Now again, imagine that you have your favourite kind of cannabis with you. Imagine holding the cannabis; as if it’s really there. Imagine the smell.. Now imagine preparing it so you can smoke it. And now imagine that it is ready to smoke, and that now you are getting ready to smoke it. Bring it to your lips, and breathe it in [1 sec], inhaling deeply. Sense how it feels to smoke it, feeling it in your chest [pause] and the taste in your mouth. Inhale it [1 sec] and exhale it. Immerse yourself in this experience and the different sensations [3 sec].* |
| **Become aware** of whatever you are experiencing in this moment as you imagine this scene, even if it is difficult or unpleasant.  In fact, it is important especially in such moments **to be open hearted and non-reactive as you notice and observe the sensations and thoughts the best you can** [pause].  **Let go of the tendency that we all have to want things to be different from how they are right now and allow things to be exactly as you find them** [5 seconds pause]. | | | As you imagine this scene **you may** experience difficult or unpleasant thoughts or sensations. **Try to wind down your mind and release any tension from your body completely.**  In fact, it is important especially in such moments **to ease any stiffness in your muscles and calm any thoughts that may be distressing in your mind** [pause].  **If you feel tension, try and release it and make yourself feel more at ease and relaxed, in order to allow things to be less unpleasant.** [5 seconds pause]. |
| Returning to the experience of smoking your favourite kind of cannabis - and the different sensations - you may start to feel some craving or urges to smoke. As you **notice** these feelings, focus **your attention inward on those feelings**. Allow your **attention to scan the sensations throughout your body.**  **Notice** where in your body you experience the craving or any difficult feelings and **what the sensations are like**. **Notice** fully each area where you experience the urge and simply tell yourself **what you are experiencing**. For example, you might say to yourself **“I feel my craving in my abdomen” or “I feel my craving in my chest”.**  **Focus** on one area where you are experiencing the craving most vividly. **Notice the exact** **sensations in that area. How does it feel?** | | | Returning to the experience of smoking your favourite kind of cannabis - and the different sensations - you may start to feel some craving and urges to smoke. As you **have** these feelings, focus **on softening your body.** Allow your **body to feel more and more loose and at ease.**  As you experience craving, or any difficult feeling in your body, **just loosen and untense your muscles and allow yourself to relax fully.** When you experience an urge, simply tell yourself **to relax and think relaxing thoughts**. For example, you might say, **“I am managing my craving**, **by calming my muscles”**, **or**, **“I am managing my craving**, **by thinking relaxing thoughts”.**  **Relax** the area where you are experiencing the craving most vividly. **Take a few slow and deep breaths…. As you breathe out, release any…** |
| **TRACK 3/3 (A & B) 7 MIN 20 SEC**  **Main task/main strategy practice** | | | |
| **MBI**  **TRACK_3A** | | | **MBI**  **TRACK_3A** |
| **(continued)** | | | |
| **Is it hot, cold, tingly, or numb? Perhaps there is another word to describe the feeling you are noticing? Are your muscles tense or relaxed? How large an area of your body is involved?**  **Notice the sensations, stay with them and describe them to yourself.** [pause] **Notice also how the sensations change in your body: how they change in shape or location or intensity. Do not struggle against the feelings; allow them and follow the way they shift and change.**  **Become aware of any thoughts about craving you might be having. Describe them to yourself [pause]. Do not try to suppress the thoughts; allow them and notice how they come and go.** | | | …**tension that you may experience. Allow your muscles to feel more and more loose and floppy in all the parts of your body, paying particular attention to the tenser areas.**  **Calm each area where you experience tension and difficult feelings. Allow any unpleasant thoughts to be calmed down** [pause]. **Continue to take slow and deep breaths… As you breathe out continue to unwind your mind and release any further tension felt in your body. Allow any thoughts and feelings to change to more calming and less unpleasant ones [pause]. Allow yourself to soften and feel relaxed. Continue to take slow deep breaths… With each exhale feel calm and relaxed.** |
| Repeat by **focusing** on each part of your body that experiences the craving. **Pay attention to and describe to yourself the changes that occur in the sensations**. **Notice how the urges come and go.**  Remember, the purpose of this exercise is **not to make the craving go away but to experience it in a different way and learn that these thoughts and feelings can be accepted and tolerated rather than acted upon** [30 secs]. | | | Repeat **releasing the tension** from each part of your body that experiences craving. **Calm down your entire body and let the muscles loosen up gradually**. **Take a few more deep breaths in order to reduce the tension.**  Remember, the purpose of this exercise **is to reduce the craving and change the feelings of craving into less unpleasant ones, through releasing tension all through the muscles in the body and calming the mind** [30 secs]. |
| And now bring your attention back to the room, gently open your eyes if they were closed. **Notice what you can see, notice what you can hear** [pause].  ***Remember that if or when you experience craving or urges to smoke cannabis, you can refrain from it by using the strategies you have been taught.***  ***Notice and observe your thoughts, feelings, and any physical reactions non-judgmentally as they arise. Allow them to be there, notice how they come and go like clouds in the sky.*** | | | And now bring your attention back to the room, open your eyes if they were closed. **You can stretch and move the different parts of your body** [pause].  ***Remember that if or when you experience craving or urges to smoke cannabis, you can refrain from it by using the strategies you have been taught.***  ***Use slow, deep breaths and release any tension in your body as it arises. Allow all your muscles to relax and allow your mind to feel calm and at ease.*** |

**Part B – Take-home Audio Script**

| **HOME PRACTICE AUDIO** | | | | |
| --- | --- | --- | --- | --- |
| **Main task/main strategy practice**  **[exactly as TRACK 3 7 MIN 20 SEC]** | | |  | |
| **MBI**  **[exactly as TRACK_3A except highlighted intro]** | **Relaxation**  **[exactly as TRACK_3B except highlighted intro]** | |  | |
| Welcome back, we are going to practice the strategy again.  While doing this exercise, your attention will probably wander from time to time. In fact, this is quite normal, and it may happen repeatedly **but try not to get caught up in these different, unrelated thoughts**. pause]. **Each time you notice your mind wandering; take a second to notice this and bring yourself back to the present experience of thoughts, feelings, and sensations** [pause 5 seconds]. | Welcome back, we are going to practice the strategy again.  While doing this exercise, your attention will probably wander from time to time. In fact, this is quite normal, and it may happen repeatedly, **but try not to get too distracted and continue to calm the mind** [pause]. **Just allow your body to continue to be relaxed by softening any tension and by letting your mind to continue to unwind and slow down** [pause 5 seconds]. | |  | |
| To start, let your eyes gently close, or fix them on a point in front of you. Try to sit in a way that ensures that you are **awake and alert**. The idea is not necessarily to **become relaxed.** The main idea is to be **awake and attentive** to fully notice and focus on what you experience in your body and mind. This will enable you to **learn how to experience craving without reacting to it**. | To start, let your eyes gently close, or fix them on a point in front of you. Try to sit in a way that ensures that you are **comfortable and tranquil**. The main idea is to learn how to deliberately **become relaxed, calm, and at ease**. This will enable you to fully **release tension from your body and unwind your mind, so that you can change how you experience cravings and reduce the intensity of them**. | |  | |
| As before, take a moment now to **notice the sensation of sitting in the chair** [pause]. Start **to notice where each part of your body touches the chair and feel your feet on the ground** [pause 5 seconds]. | As before, take a moment now to **adopt a calm state of mind** [pause]. **Make sure you sit in a comfortable position in the chair and relax any tension that you feel in your body** [pause 5 seconds]. | |  | |
| Now take a slow and deep breath and **direct your attention to focus on the physical sensations of your breath** [pause 5 seconds]. You don't need to do anything special with your breathing. Simply **notice the rise and fall of your chest or abdomen as you breathe in through your nose and gently breathe out.** [pause 5 seconds].  As you breathe in **notice** the cool air coming into your nostrils [pause], and the warm air as you breathe out. | Now take a slow and deep breath. **As you breathe in, naturally allow your belly to rise, and to fall, as you breathe out, making sure that it feels comfortable** [pause 5 seconds]. B**reathe in through your nose and gently breathe out.** [pause 5 seconds.] **Feel relaxed and calm through your body and mind.** B**reathe in through your nose and gently breathe out.**  **Feel calm** as you breathe in [pause], and feel any tension leave as you breathe out. | |  | |
| *Now again, imagine that you have your favourite kind of cannabis with you. Imagine holding the cannabis; as if it’s really there. Imagine the smell.. Now imagine preparing it so you can smoke it. And now imagine that it is ready to smoke, and that now you are getting ready to smoke it. Bring it to your lips, and breathe it in [1 sec], inhaling deeply. Sense how it feels to smoke it, feeling it in your chest [pause] and the taste in your mouth.* | *Now again, imagine that you have your favourite kind of cannabis with you. Imagine holding the cannabis; as if it’s really there. Imagine the smell.. Now imagine preparing it so you can smoke it. And now imagine that it is ready to smoke, and that now you are getting ready to smoke it. Bring it to your lips, and breathe it in [1 sec], inhaling deeply. Sense how it feels to smoke it, feeling it in your chest [pause] and the taste in your mouth.* | |  | |
| **HOME PRACTICE AUDIO** | | | |
| **Main task/main strategy practice**  **[exactly as TRACK 3 7 MIN 20 SEC]** | | | |
| **MBI**  **[exactly as TRACK_3A except highlighted intro]** | | **Relaxation**  **[exactly as TRACK_3B except highlighted intro]** | |
| **(continued)** | | |  | |
| *Inhale it, [1 sec] and exhale it. Immerse yourself in this experience and the different sensations [3 sec].* | *Inhale it [1 sec] and exhale it. Immerse yourself in this experience and the different sensations [3 sec].* | |  | |
| **Become aware** of whatever you are experiencing in this moment as you imagine this scene, even if it is difficult or unpleasant.  In fact, it is important especially in such moments **to be open hearted and non-reactive as you notice and observe the sensations and thoughts the best you can** [pause].  **Let go of the tendency that we all have to want things to be different from how they are right now and allow things to be exactly as you find them** [5 seconds pause]. | As you imagine this scene **you may** experience difficult or unpleasant thoughts or sensations. **Try to wind down your mind and release any tension from your body completely.**  In fact, it is important especially in such moments **to ease any stiffness in your muscles and calm any thoughts that may be distressing in your mind** [pause].  **If you feel tension, try and release it and make yourself feel more at ease and relaxed, in order to allow things to be less unpleasant.** [5 seconds pause]. | |  | |
| Returning to the experience of smoking your favourite kind of cannabis - and the different sensations - you may start to feel some craving or urges to smoke. As you **notice** these feelings, focus **your attention inward on those feelings**. Allow your **attention to scan the sensations throughout your body.**  **Notice** where in your body you experience the craving or any difficult feelings and **what the sensations are like**. **Notice** fully each area where you experience the urge and simply tell yourself **what you are experiencing**. For example, you might say to yourself **“I feel my craving in my abdomen” or “I feel my craving in my chest”.**  **Focus** on one area where you are experiencing the craving most vividly. **Notice the exact sensations in that area. How does it feel? Is it hot, cold, tingly, or numb? Perhaps there is another word to describe the feeling you are noticing? Are your muscles tense or relaxed? How large an area of your body is involved?**  **Notice the sensations, stay with them and describe them to yourself.** [pause] **Notice also how the sensations change in your body: how they change in shape or location or intensity. Do not struggle against the feelings; allow them and follow the way they shift and change.** | Returning to the experience of smoking your favourite kind of cannabis - and the different sensations - you may start to feel some craving and urges to smoke. As you **have** these feelings, focus **on softening your body.** Allow your **body to feel more and more loose and at ease.**  As you experience craving, or any difficult feeling in your body, **just loosen and untense your muscles and allow yourself to relax fully.** When you experience an urge, simply tell yourself **to relax and think relaxing thoughts**. For example, you might say, **“I am managing my craving**, **by calming my muscles”**, **or**, **“I am managing my craving**, **by thinking relaxing thoughts”.**  **Relax** the area where you are experiencing the craving most vividly. **Take a few slow and deep breaths….As you breathe out, release any tension that you may experience. Allow your muscles to feel more and more loose and floppy in all the parts of your body, paying particular attention to the tenser areas.**  **Calm each area where you experience tension and difficult feelings. Allow any unpleasant thoughts to be calmed down** [pause]. **Continue to take slow and deep breaths… As you breathe out continue to unwind your mind and release any further tension felt in your body. Allow any thoughts and feelings to change**… | |  | |
| **HOME PRACTICE AUDIO** | | | |
| **Main task/main strategy practice**  **[exactly as TRACK 3 7 MIN 20 SEC]** | | | |
| **MBI**  **[exactly as TRACK_3A except highlighted intro]** | | **Relaxation**  **[exactly as TRACK_3B except highlighted intro]** | |
| **(continued)** | | |  | |
| **Become aware of any thoughts about craving you might be having. Describe them to yourself [pause]. Do not try to suppress the thoughts; allow them and notice how they come and go.** | …**to more calming and less unpleasant ones [pause]. Allow yourself to soften and feel relaxed. Continue to take slow deep breaths… With each exhale feel calm and relaxed.** | |  | |
| Repeat by **focusing** on each part of your body that experiences the craving. **Pay attention to and describe to yourself the changes that occur in the sensations**. **Notice how the urges come and go.**  Remember, the purpose of this exercise is **not to make the craving go away but to experience it in a different way and learn that these thoughts and feelings can be accepted and tolerated rather than acted upon** [pause 30 secs]. | Repeat **releasing the tension** from each part of your body that experiences craving. **Calm down your entire body and let the muscles loosen up gradually**. **Take a few more deep breaths in order to reduce the tension.**  Remember, the purpose of this exercise **is to reduce the craving and change the feelings of craving into less unpleasant ones, through releasing tension all through the muscles in the body and calming the mind** [pause 30 secs]. | |  | |
| And now bring your attention back to the room, gently open your eyes if they were closed. **Notice what you can see, notice what you can hear** [pause].  ***Remember that if or when you experience craving or urges to smoke cannabis, you can refrain from it by using the strategies you have been taught.***  ***Notice and observe your thoughts, feelings, and any physical reactions non-judgmentally as they arise. Allow them to be there, notice how they come and go like clouds in the sky.*** | And now bring your attention back to the room, open your eyes if they were closed. **You can stretch and move the different parts of your body** [pause].  ***Remember that if or when you experience craving or urges to smoke cannabis, you can refrain from it by using the strategies you have been taught.***  ***Use slow, deep breaths and release any tension in your body as it arises. Allow all your muscles to relax and allow your mind to feel calm and at ease.*** | |  | |

- - 1. ***Post-Post-intervention Questionnaires***

After the intervention recordings were delivered, participants completed a daily questionnaire (~3 minutes). The questionnaire collected information relating to cannabis exposure (i.e., the quantity of use, occurrences of dangerous use, the intensity of urges and cravings, and mental state). Additionally, participants allocated to the MBI and relaxation conditions completed additional items relating to compliance with the intervention (e.g., when urges arose, did you practice strategies from the audio track).

- 1. **Behavioural Data**
     1. ***Normality Checks and Descriptives***

All behavioural data were quality-checked via boxplots to inspect for outliers. Data normality tests were performed via the Shapiro-Wilk test and visual inspections, including histograms and quantile-quantile plots. Chi-square tests were used to compare categorical variables (i.e., sex, handedness, and intervention completion percentage). To compare groups for non-normally distributed data, a series of Kruskal-Wallis tests were conducted (i.e., substance use measures including the CUDIT, CWS, CL, age of onset, age of regular use, cannabis days/past month, cannabis dose past/month, alcohol days/past month, standard drinks/past month, FTND, nicotine days/past month, nicotine cigarettes and/or vapes/past month, and intervention duration days). Additionally, ANOVAs were run for normally distributed data (i.e., years of education, IQ, AUDIT scores, AES, and intervention compliance days).

- - 1. ***Intervention-by-time Effects on Behavioural Data***

A series of ANOVAs were used to examine the main effects of the intervention group and time, as well as the interaction of group and time on behavioural data. The variables examined were: cannabis use measures (i.e., CUDIT, CWS, cannabis days and grams/past two, hours abstinent from cannabis); substance use measures (i.e., alcohol days and dose per month, nicotine days and dose per month); psychopathology symptom scores (i.e., PSS, STAI-Y, and); mindfulness measure (i.e., FFMQ and TMS), relaxation measures (i.e., Visual Analogue Scale [VAS]), and reward reaction times (i.e., MID task smile and neutral scores). Pre-to-post-intervention time points and intervention group (i.e., mindfulness, relaxation, no intervention) were entered into the model as fixed factors.

- 1. **Imaging Procedure**
     1. ***Imaging Protocol***

All participants were scanned with a 3 T Skyra MRI at Monash Biomedical Imaging in Melbourne between 2019 and 2022. T1-weighted images were acquired using a three-dimension (3D) magnetization-prepared rapid gradient-echo (MP-RAGE), with 192 slices, voxel size = 1×1×1 cubic millimetre (mm3), acquisition time = 5:12 min, repetition time = 23 milliseconds (ms), echo time (TE) = 2.07 ms, field of view = 256mm by 256mm, inversion time (TI) = 900 ms, flip angle = 9°. The functional scan applied a gradient-echo-planar sequence with repetition time (TR) = 1600 ms, echo time (TE) = 23 ms, field of view = 190mm by 190mm, flip angle = 72°, in-plane resolution = 3 mm by 3 mm, slice thickness = 3.5 mm and 33 slices.

- 1. **Monetary Incentive Delay(MID) fMRI Task**

The MID task was administered using an adapted version (Hoogendam et al., 2013; Knutson et al., 2001); the instructions included: “*In this task, your goal is to win as much (virtual) money as possible. You will see a smiley face, followed by a star, and then an exclamation mark. Your job is to press the blue button (on the left) as quickly as possible when you see the exclamation mark. Press the button now to practice. There will be a short practice run before the task.”*

- 1. **Imaging Data Processing**
     1. ***Data Pre-processing and Quality Checks***

The steps comprised slice time corrections of distortion, coregistration, normalisation to standardising spaces (i.e., Montreal Neurological Institute [MNI] space) and smoothing with 6mm Gaussian kernel. The quality of images was examined using Framewise Displacement (FD), followed by Derivatives of Root Mean Square Variance over Voxels (DVARS) to gauge noise levels and voxel-wise signal plots (i.e., carpet plots). FD parameters were measured using conservative criteria (Parkes et al., 2018). The number of participants removed due to fMRI quality checks was 9.

- - 1. ***First Level Analysis***

First-level analyses were computed using SPM (version 12: https://www.fil.ion.ucl.ac.uk/spm/software/spm12) via MATLAB (version r7771). The analysis used a general linear model (GLM) to measure the associations between the detected blood-oxygen-level-dependent (BOLD) response and six explanatory factors: i) anticipating monetary cues; ii) anticipating neutral cues; iii) receipt of monetary wins; iv) receipt of missed monetary wins; v) receipt of neutral wins; vi) receipt of missed neutral wins. The onset of the anticipation factors was set at the time of cue presentation, with a duration range of 1529–7479 ms. In contrast, the onset of the feedback factor was set to the time of the target presentation, with a duration of 2,000 ms. Additionally, six motion estimations obtained during the realignment process, which translate and rotate across the x, y, and z axes, were selected as covariates of no interest to address residual head motion effects. Additionally, a high-pass filter with a cutoff frequency of 1/204 Hz was used to remove low-frequency drift.

Statistical maps were generated for each participant based on three contrasts: i) anticipation of monetary cues vs. anticipation of neutral cues, ii) receipt of monetary wins vs. receipt of neutral wins, and iii) receipt of monetary wins vs. receipt of missed monetary wins.

- - 1. ***Region of Interest***

ROI analyses were performed in a priori ROIs selected based on Hoogendam et al. (2013) original manuscript on the brain functional correlates of the MID fMRI task, which included the bilateral ventral striatum, dorsal caudate, putamen, insula, and anterior cingulate cortex (ACC) and orbitofrontal cortices (OFC). All ROIs were visualised on representative MNI slices at y = 8 (coronal) and z = -8 (axial) (see Figure 1).


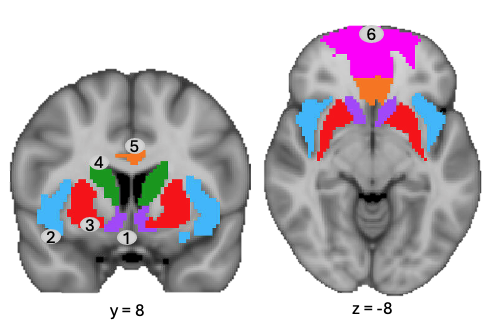
**Figure 1.** *Regions of Interest (ROIs) Mapped on Coronal and Axial Brain Slices*

Note. Coronal (y = 8) and axial (z = -8) slices showing regions of interest (ROIs) selected the fMRI analsysis including: (1) ventral striatum; (2) insula; (3) putamen; (4) dorsal caudate; (5) ACC; (6) OFC; adapted from (Hoogendam et al., 2013).

1. **Results**
   1. ***Overview of Region of Interest Analysis***

As shown in Tables 1-3, there were no significant intervention effects (MBI, relaxation, and no-intervention), time effects, or effects of intervention-by-time in pre-selected ROIs: (1) ventral striatum; (2) insula; (3) putamen; (4) dorsal caudate; (5) ACC; (6) OFC; adapted from (Hoogendam et al., 2013).

**Table 2.** *Overview of Non-Significant Brain Activity (ROI Beta Values) in CUD while Anticipating Monetary Cues vs. Anticipating Neutral Cues*

| **ROI** |  | **Time** | **Mindfulness** | **Relaxation** | **No intervention** | **Intervention** | | **Time** | | **Intervention *Time** | |
| --- | --- | --- | --- | --- | --- | --- | --- | --- | --- | --- | --- |
|  |  | **Mean (SD)** | |  |  | ***F (df=2*** | ***p*** | ***F (df=1)*** | ***p*** | ***F (df=2)*** | ***p*** |
| ***Striatum*** | ventral, left | *BL* | .12 (.28) | 0.12 (.22) | 0-.14 (.26) |  |  |  |  |  |  |
|  |  | *FU* | .10 (.28) | .02 (.25) | .05 (.29) | 2.77 | .068 | 0.18 | .672 | 2.55 | .084 |
|  | ventral, right | *BL* | 0.03 (0.31) | 0.07 (0.27) | -0.11 (0.19) |  |  |  |  |  |  |
|  |  | *FU* | 0.12 (0.29) | 0.09 (0.26) | 0.05 (0.26) | 1.63 | .202 | 2.98 | .088 | .55 | .580 |
| ***insula*** | left | *BL* | 0.05 (0.22) | 0.06 (0.13) | -0.06 (0.17) |  |  |  |  |  |  |
|  |  | *FU* | 0.08 (0.28) | 0.04 (0.19) | 0.02 (0.15) | 1.52 | .224 | .58 | .450 | .41 | .664 |
|  | right | *BL* | 0.04 (0.23) | 0.1 (0.16) | -0.08 (0.19) |  |  |  |  |  |  |
|  |  | *FU* | 0.07 (0.27) | 0.04 (0.22) | 0.02 (0.16) | 2.00 | .142 | .33 | .566 | 1.08 | .344 |
| ***Putamen*** | left | *BL* | 0.07 (0.27) | 0.11 (0.24) | -0.06 (0.24) |  |  |  |  |  |  |
|  |  | *FU* | 0.07 (0.28) | 0.09 (0.24) | 0.01 (0.22) | 2.08 | .131 | .12 | .725 | .32 | .729 |
|  | right | *BL* | 0.03 (0.26) | 0.11 (0.22) | -0.04 (0.19) |  |  |  |  |  |  |
|  |  | *FU* | 0.04 (0.23) | 0.06 (0.22) | 0.03 (0.18) | 1.39 | .255 | .04 | .844 | .61 | .546 |
| ***Caudate*** | dorsal, left | *BL* | 0.07 (0.3) | 0.04 (0.27) | -0.16 (0.25) |  |  |  |  |  |  |
|  |  | *FU* | 0.08 (0.31) | 0.08 (0.25) | -0.04 (0.28) | 3.20 | .046 | .93 | .337 | .32 | .729 |
|  | dorsal, right | *BL* | 0.11 (0.3) | 0.01 (0.3) | -0.21 (0.31) |  |  |  |  |  |  |
|  |  | *FU* | 0.12 (0.36) | 0.09 (0.3) | -0.08 (0.29) | 5.40 | .006 | 1.24 | .268 | .31 | .735 |
| ***ACC*** |  | *BL* | 0.11 (0.22) | 0.01 (0.19) | -0.08 (0.15) |  |  |  |  |  |  |
|  |  | *FU* | 0.1 (0.32) | 0.04 (0.17) | 0.03 (0.22) | 2.43 | .094 | .89 | .349 | .61 | .544 |
| ***OFC*** |  | *BL* | 0.1 (0.16) | 0.03 (0.12) | -0.02 (0.15) |  |  |  |  |  |  |
|  |  | *FU* | 0.06 (0.27) | 0.01 (0.13) | -0.02 (0.17) | 2.23 | .113 | .23 | .634 | .14 | .873 |

*Note*. Anterior Cingulate Cortex (ACC); Orbitofrontal Cortices (OFC).

| **ROI** |  | **Time** | **Mindfulness** | **Relaxation** | **No intervention** | **Intervention** | | **Time** | | **Intervention *Time** | |
| --- | --- | --- | --- | --- | --- | --- | --- | --- | --- | --- | --- |
|  |  | **Mean (SD)** | |  |  | ***F (df=2*** | ***p*** | ***F (df=1)*** | ***p*** | ***F (df=2)*** | ***p*** |
| ***Striatum*** | ventral, left | *BL* | .75 (.99) | .07 (1.25) | .24 (1.1) |  |  |  |  |  |  |
|  |  | *FU* | .46 (0.93) | .24 (1.67) | .02 (1.05) | 1.50 | .229 | .22 | .640 | .34 | .713 |
|  | ventral, right | *BL* | .81 (0.99) | 0.08 (1.19) | 0.26 (1.36) |  |  |  |  |  |  |
|  |  | *FU* | 0.47 (0.73) | 0.25 (1.22) | -0.53 (2.44) | 2.30 | .107 | 1.18 | .280 | .88 | .420 |
| ***insula*** | left | *BL* | 0.4 (0.61) | -0.25 (0.59) | -0.1 (0.86) |  |  |  |  |  |  |
|  |  | *FU* | -0.02 (0.87) | -0.38 (0.94) | -0.16 (0.98) | 3.06 | .052 | 1.44 | .233 | .43 | .654 |
|  | right | *BL* | 0.44 (0.82) | -0.37 (0.84) | -0.05 (0.98) |  |  |  |  |  |  |
|  |  | *FU* | -0.08 (0.99) | -0.27 (0.81) | -0.16 (1.41) | 1.94 | .149 | .73 | .395 | .75 | .478 |
| ***Putamen*** | left | *BL* | 0.36 (0.8) | -0.49 (1.29) | 0.05 (0.95) |  |  |  |  |  |  |
|  |  | *FU* | 0.21 (0.67) | -0.41 (1.37) | -0.09 (0.83) | 3.73 | .028 | .11 | .739 | .13 | .877 |
|  | right | *BL* | 0.29 (0.51) | -0.17 (0.79) | 0.11 (1.01) |  |  |  |  |  |  |
|  |  | *FU* | -0.06 (0.6) | -0.47 (1.3) | -0.26 (1.01) | 1.60 | .208 | 3.39 | .069 | .01 | .987 |
| ***Caudate*** | dorsal, left | *BL* | 0.61 (0.88) | 0.14 (1.39) | 0.25 (1.3) |  |  |  |  |  |  |
|  |  | *FU* | 0.44 (0.93) | -0.43 (1.49) | 0.2 (0.71) | 2.47 | .090 | 1.28 | .260 | .44 | .647 |
|  | dorsal, right | *BL* | 0.37 (0.84) | -0.18 (1.32) | 0.19 (1.3) |  |  |  |  |  |  |
|  |  | *FU* | 0.32 (0.77) | -0.48 (1.47) | -0.11 (0.76) | 2.59 | .081 | .94 | .335 | .13 | .883 |
| ***ACC*** |  | *BL* | 0.19 (0.82) | 0.18 (1.13) | 0.18 (1.06) |  |  |  |  |  |  |
|  |  | *FU* | 0.3 (0.75) | -0.02 (1.26) | 0.11 (0.72) | .24 | .785 | .07 | .787 | .20 | .821 |
| ***OFC*** |  | *BL* | 0.2 (0.4) | 0.2 (0.54) | 0.17 (0.74) |  |  |  |  |  |  |
|  |  | *FU* | 0.22 (0.54) | 0.11 (0.79) | 0.04 (0.5) | .26 | .774 | .32 | .573 | .14 | .870 |

**Table 3.** *Overview of Non-Significant Brain Activity (ROI Beta Values) in CUD while Receiving Monetary Wins vs. Receiving Neutral Wins*

*Note*. Anterior Cingulate Cortex (ACC); Orbitofrontal Cortices (OFC).

**Table 4.** *Overview of Non-Significant Brain Activity (ROI Beta Values) in CUD while Receiving Monetary Wins vs. Receiving Missed Wins*

| **ROI** |  | **Time** | **Mindfulness** | **Relaxation** | **No intervention** | **Intervention** | | **Time** | | **Intervention *Time** | |
| --- | --- | --- | --- | --- | --- | --- | --- | --- | --- | --- | --- |
|  |  | **Mean (SD)** | |  |  | ***F (df=2*** | ***p*** | ***F (df=1)*** | ***p*** | ***F (df=2)*** | ***p*** |
| *Striatum* | ventral, left | *BL* | 0.49 (1.03) | 0.51 (1.15) | 0.33 (1.24) |  |  |  |  |  |  |
|  |  | *FU* | 0.51 (0.69) | 0.96 (0.95) | 0.08 (1.8) | 1.46 | .238 | .10 | .753 | .66 | .519 |
|  | ventral, right | *BL* | 0.75 (1.05) | 0.79 (1.15) | 0.22 (1.85) |  |  |  |  |  |  |
|  |  | *FU* | 0.49 (0.94) | 0.99 (1) | -0.3 (2.26) | 3.30 | .042 | .40 | .529 | .48 | .622 |
| ***insula*** | left | *BL* | -0.14 (0.91) | -0.28 (0.58) | -0.17 (0.79) |  |  |  |  |  |  |
|  |  | *FU* | -0.11 (0.82) | -0.14 (0.52) | -0.14 (1.6) | 3.30 | .042 | .11 | .736 | .04 | .966 |
|  | right | *BL* | -0.11 (1.02) | -0.7 (1.31) | -0.3 (1.11) |  |  |  |  |  |  |
|  |  | *FU* | -0.12 (0.92) | -0.14 (0.59) | -0.22 (1.56) | .60 | .550 | .83 | .366 | .54 | .583 |
| ***Putamen*** | left | *BL* | 0.42 (1.16) | 0.47 (0.9) | 0.19 (1.28) |  |  |  |  |  |  |
|  |  | *FU* | 0.14 (0.95) | 0.2 (0.82) | 0.07 (1.78) | .27 | .767 | .80 | .372 | .04 | .957 |
|  | right | *BL* | 0.31 (1.14) | 0.02 (1) | 0.07 (1.34) |  |  |  |  |  |  |
|  |  | *FU* | -0.09 (1.01) | 0.11 (0.58) | -0.22 (1.63) | .20 | .819 | .71 | .401 | .37 | .692 |
| ***Caudate*** | dorsal, left | *BL* | 0.26 (1.33) | 0.42 (1.47) | 0.5 (1.26) |  |  |  |  |  |  |
|  |  | *FU* | 0.33 (1.04) | 0.46 (1.1) | -0.17 (2.61) | .23 | .797 | .33 | .569 | .58 | .561 |
|  | dorsal, right | *BL* | 0.27 (1.43) | 0.19 (1.36) | 0.36 (1.28) |  |  |  |  |  |  |
|  |  | *FU* | 0.26 (1.06) | 0.42 (0.97) | -0.2 (1.74) | .25 | .777 | .18 | .677 | .74 | .478 |
| ***ACC*** |  | *BL* | -0.23 (1.22) | -0.29 (0.78) | -0.06 (0.83) |  |  |  |  |  |  |
|  |  | *FU* | -0.11 (0.88) | 0.02 (0.65) | -0.35 (1.19) | .05 | .952 | .06 | .804 | .85 | .433 |
| ***OFC*** |  | *BL* | 0.12 (0.73) | 0.14 (0.58) | 0.14 (0.63) |  |  |  |  |  |  |
|  |  | *FU* | -0.05 (0.53) | 0.28 (0.32) | -0.25 (1.23) | .92 | .403 | .84 | .362 | 1.03 | .362 |

*Note*. Anterior Cingulate Cortex (ACC); Orbitofrontal Cortices (OFC).

- 1. **fMRI Results: Whole-Brain Analysis**

Table 5 outlines significant whole-brain interaction effects/post hoc analyses, and Table 6 provides an overview of the location and strengths of the peak clusters showing brain function changes for the anticipatory phases of the task—*anticipating monetary cues vs. neutral cues*, and for the outcome phases of the task—*receiving monetary wins* vs. *neutral wins* and *receiving monetary wins* vs. *missed wins.*

| **Whole brain** |  | **Time** | **MBI** | **Relaxation** | **No Intervention** | **Intervention** | | **Time** | | **Intervention***  **Time** | | **Post Hoc** | | | | | |
| --- | --- | --- | --- | --- | --- | --- | --- | --- | --- | --- | --- | --- | --- | --- | --- | --- | --- |
|  | Mean (SD) |  |  |  |  |  |  |  |  | **Δ MBI** | | **Δ Relaxation** | | **Δ No intervention** | |
|  |  |  |  |  |  | *F*  *(df=2)* | *p* | *F*  *(df=2)* | *p* | *F*  *(df=2)* | *p* | *t (df=34)* | *p* | *t (df=28)* | *p* | *t (df=30)* | *p* |
| ***Anticipating Monetary Cues > Anticipating Neutral Cues*** | |  |  |  |  |  | | | | |  |  |  |  |  |  |  |
| *Cerebellum* | left | *BL* | .32 (0.8) | .17 (.45) | -.54 (.59) |  |  |  |  |  |  | -3.03 | .002** | -.33 | .371 | 3.04 | .002** |
|  |  | *FU* | -.49 (0.8) | .10 (0.56) | .13 (.66) | 1.40 | .243 | .20 | .626 | 10.6 | <.001 |
| ***Receipt of Monetary Wins vs. Receipt of Neutral Wins*** | |  |  |  |  |  | | | | |  |  |  |  |  |  |  |
| *Parietal* | right | *BL* | -.25 (0.52) | -.08 (0.54) | .63 (.77) |  |  |  |  |  |  | 2.29 | .014* | 1.94 | .031* | -4.23 | <.001*** |
| *FU* | .18 (0.61) | .36 (0.68) | -.36 (.54) | .85 | .430 | .11 | .746 | 14.30 | <.001 |
| *Hippocampus* | right | *BL* | .19 (.36) | -.33 (.67) | .39 (.65) |  |  |  |  |  |  | -1.79 | .083 | 2.63 | .007** | -4.00 | <.001*** |
| *FU* | -.12 (.64) | .24 (.5) | -.52 (.64) | .24 | .790 | 3.32 | .072 | 12.23 | <.001 |
| *Insula* | superior, left | *BL* | -.11 (1.00) | -.65 (.77) | .60 (.81) |  |  |  |  |  |  | -.31 | .380 | 1.98 | .029* | -4.27 | <.001*** |
| *FU* | -.21 (.94) | -.03 (.96) | -.53 (.68) | 1.07 | .346 | 1.29 | .259 | 7.92 | <.001 |
| *Insula* | left | *BL* | -.01 (.56) | -.45 (.52) | .59 (.45) |  |  |  |  |  |  | -.20 | .421 | 1.73 | .048* | -6.03 | <.001*** |
| *FU* | -.05 (.58) | -.11 (.57) | -.44 (.52) | 3.20 | .044 | 5.00 | .028 | 13.60 | <.001 |
| *Parietal* | right | *BL* | -.02 (.60) | -.35 (.59) | .63 (.81) |  |  |  |  |  |  | .18 | .431 | 2.69 | .006** | -4.03 | <.001*** |
| *FU* | .02 (.69) | .38 (.87) | -.36 (.55) | .26 | .770 | .27 | .606 | 11.96 | <.001 |
| *Parietal* | middle, left | *BL* | .01 (.79) | -.36 (.69) | .59 (.76) |  |  |  |  |  |  | -.12 | .452 | 2.52 | .009** | -3.61 | <.001*** |
| *FU* | -.02 (.86) | .28 (.71) | -.40 (.79) | .08 | .925 | .68 | .412 | 9.08 | <.001 |
| *Parietal* | left | *BL* | .01 (.94) | -.69 (.97) | .70 (1.1) |  |  |  |  |  |  | -.64 | .262 | 2.81 | .004** | -3.18 | .002* |
|  | *FU* | -.21 (1.1) | .31 (.98) | -.33 (.69) | .73 | .485 | .19 | .664 | 8.68 | <.001 |
| ***Receipt of Monetary Wins vs. Receipt of Missed Wins*** | | |  |  |  |  | | | | |  |  |  |  |  |  |  |
| *Parietal* | *right* | *BL* | .42 (.80) | -.42 (.52) | .43 (1.24) |  |  |  |  |  |  | -3.58 | <.001** | 3.65 | <.001*** | -1.38 | .089 |
|  | *FU* | -.61 (.93) | .42 (.72) | -.09 (.84) | .77 | .467 | 1.72 | .192 | 9.62 | <.001 |
| *Fusiform gyrus* | *right* | *BL* | .50 (1.31) | -.19 (.81) | .34 (1.03) |  |  |  |  |  |  | -2.31 | .014* | 3.83 | <.001*** | -.60 | .278 |
|  | *FU* | -.33 (.78) | 1.06 (.98) | .14 (.88) | 1.20 | .307 | .14 | .709 | 9.48 | <.001 |
| *Frontal gyrus* | superior, right | *BL* | .44 (.87) | -.43 (.60) | .44 (1.01) |  |  |  |  |  |  | -3.34 | .001** | 4.23 | <.001*** | -.58 | .283 |
|  | *FU* | -.51 (.83) | .47 (.56) | .24 (.94) | 1.66 | .197 | .25 | .616 | 10.17 | **<.001** |

**Table 5.** *Overview of Whole-Brain Results of Intervention, Time and Intervention-by-Time Effects During the MID Task Contrasts, Adjusting for Age and Sex*

Note. Δ = change pre-to-post intervention; *SD* = standard deviation; *F* = F-statistic; *df* = degrees of freedom; Z = Mann-Whitney; t= Independent samples t-test; Bolded p-values = statistically significant differences *< .05; **< .01; ***< .001

| Contrast | Brain Regions | Cluster-level | | | MNI Coordinates | | | T score |
| --- | --- | --- | --- | --- | --- | --- | --- | --- |
|  |  | *P*-corrected | *k E* | *P* -uncorrected | X | Y | Z |  |
| ***Anticipating Monetary Cues > Anticipating Neutral Cues*** |  |  |  |  |  |  |  |  |
| Δ*MBI vs.* Δ*No-intervention* | L cerebellum | 0.034 | 84 | 0.001 | -50 | -52 | -40 | 4.21 |
| ***Receipt of Monetary Wins vs. Receipt of Neutral Wins*** |  |  |  |  |  |  |  |  |
| Δ*MBI vs.* Δ*No-intervention* | Parietal lobe | .998 | 14 | .087 | -14 | -54 | 72 | 3.52 |
| Δ*Relaxation vs.* Δ*No-intervention* | R hippocampus | .143 | 56 | .002 | 22 | -34 | 12 | 4.32 |
|  | L insula (superior) | .215 | 50 | .003 | -50 | -28 | 14 | 3.98 |
|  | L insula | .215 | 50 | .003 | -34 | -24 | 2 | 4.45 |
|  | R parietal lobe | .000 | 379 | .000 | 22 | -76 | 32 | 4.85 |
|  | L parietal lobe (middle) | .175 | 53 | .003 | -38 | -64 | 16 | 3.66 |
|  | L parietal lobe | .043 | 74 | .001 | -34 | 80 | 32 | 3.97 |
| ***Receipt of Monetary Wins vs. Receipt of Missed Wins*** | R parietal/temporal lobe | .001 | 154 | .000 | 50 | -60 | 26 | 4.13 |
| *MBI vs.* Δ*Relaxation* | R visual cortex fusiform | .000 | 209 | .000 | 18 | -94 | -14 | 4.00 |
|  | R superior frontal gyrus | .003 | 126 | .000 | 34 | 14 | 54 | 3.96 |

**Table 6**. Location and Strength of Peak Clusters Showing Brain Functional Changes

*Note.* R = right; L = left; Δ = change pre-to-post intervention; brain regions labelled using AAL Atlas. P-corrected = corrected p value using family-wise error; *kE* =cluster extent (number of voxels); p-uncorrected = uncorrected p-values; All coordinates were presented in Montreal Neurological Institute (MNI) space. Cluster threshold k >70 voxels, initial *p* < 0.001.

**References**

Allsop, D. J., Norberg, M. M., Copeland, J., Fu, S., & Budney, A. J. (2011). The Cannabis Withdrawal Scale development: patterns and predictors of cannabis withdrawal and distress. *Drug Alcohol Depend*, *119*(1-2), 123-129. <https://doi.org/10.1016/j.drugalcdep.2011.06.003>

Babor, T. F., Higgins-Biddle, J. C., Saunders, J. B., Monteiro, M. G., & Organization, W. H. (2001). *AUDIT: the alcohol use disorders identification test: guidelines for use in primary health care*.

Baer, R., Smith, G., Lykins, E., Button, D., Krietemeyer, J., Sauer, S., Walsh, E., Duggan, D., Williams, J., & Gu, J. (2008). FFMQ-15: 15-item five-facet mindfulness questionnaire. *Assessment*, *15*(3), 329-342. <https://journals.sagepub.com/doi/10.1177/1073191107313003?url_ver=Z39.88-2003&rfr_id=ori:rid:crossref.org&rfr_dat=cr_pub%20%200pubmed>

Beck, A. T., Steer, R. A., & Brown, G. K. (1996). Beck depression inventory.

Cohen, S., Kamarck, T., & Mermelstein, R. (1983). A global measure of perceived stress, journal of health and social behavior, vol. 24. In.

First, M. B., Williams, J. B., Karg, R. S., & Spitzer, R. L. (2015). SCID-5-RV.

Hoogendam, J. M., Kahn, R. S., Hillegers, M. H., van Buuren, M., & Vink, M. (2013). Different developmental trajectories for anticipation and receipt of reward during adolescence. *Dev Cogn Neurosci*, *6*, 113-124. <https://doi.org/10.1016/j.dcn.2013.08.004>

Kamboj, S. K., Irez, D., Serfaty, S., Thomas, E., Das, R. K., & Freeman, T. P. (2017). Ultra-Brief Mindfulness Training Reduces Alcohol Consumption in At-Risk Drinkers: A Randomized Double-Blind Active-Controlled Experiment. *Int J Neuropsychopharmacol*, *20*(11), 936-947. <https://doi.org/10.1093/ijnp/pyx064>

Knutson, B., Adams, C. M., Fong, G. W., & Hommer, D. (2001). Anticipation of increasing monetary reward selectively recruits nucleus accumbens. *The Journal of neuroscience*, *21*(16), RC159.

Lau, M. A., Bishop, S. R., Segal, Z. V., Buis, T., Anderson, N. D., Carlson, L., Shapiro, S., Carmody, J., Abbey, S., & Devins, G. (2006). The Toronto Mindfulness Scale: development and validation. *J Clin Psychol*, *62*(12), 1445-1467. <https://doi.org/10.1002/jclp.20326>

Lorenzetti, V., Solowij, N., Whittle, S., Fornito, A., Lubman, D. I., Pantelis, C., & Yücel, M. (2015). Gross morphological brain changes with chronic, heavy cannabis use. *The British Journal of Psychiatry*, *206*(1), 77-78.

Marshall, S. E. (2013). *The Cannabis use disorder identification test-revised (CUDIT-R): categorisation and interpretation* University of Tasmania].

Parkes, L., Fulcher, B., Yucel, M., & Fornito, A. (2018). An evaluation of the efficacy, reliability, and sensitivity of motion correction strategies for resting-state functional MRI. *Neuroimage*, *171*, 415-436. <https://doi.org/10.1016/j.neuroimage.2017.12.073>

Sheehan, D., Lecrubier, Y., & Janavs, J. (1994). International Neuropsychiatric Interview (MINI). In: Tampa, FL: University of South Florida Institute for Research in Psychiatry ….

Slavet, J. D., Stein, L. A., Colby, S. M., Barnett, N. P., Monti, P. M., Golembeske, C., Jr., & Lebeau-Craven, R. (2006). The Marijuana Ladder: measuring motivation to change marijuana use in incarcerated adolescents. *Drug Alcohol Depend*, *83*(1), 42-48. <https://doi.org/10.1016/j.drugalcdep.2005.10.007>

Sobell, L. C., & Sobell, M. B. (1992). Timeline Follow-Back. In R. Z. Litten & J. P. Allen (Eds.), *Measuring Alcohol Consumption* (pp. 41-72). Humana Press. <https://doi.org/10.1007/978-1-4612-0357-5_3>

Solowij, N., Stephens, R. S., Roffman, R. A., Babor, T., Kadden, R., Miller, M., Christiansen, K., McRee, B., Vendetti, J., & Marijuana Treatment Project Research, G. (2002). Cognitive functioning of long-term heavy cannabis users seeking treatment. *Jama*, *287*(9), 1123-1131. <https://doi.org/10.1001/jama.287.9.1123>

Spielberger, C. D. (2012). State-trait anxiety inventory for adults. <https://doi.org/10.1037/t06496-000>

Veale, J. F. (2014). Edinburgh Handedness Inventory – Short Form: A revised version based on confirmatory factor analysis. *Laterality*, *19*(2), 164-177. <https://doi.org/10.1080/1357650X.2013.783045>

Wechsler, D. (2018). Wechsler abbreviated scale of intelligence. <https://doi.org/10.1037/t15171-000>

Yucel, M., Solowij, N., Respondek, C., Whittle, S., Fornito, A., Pantelis, C., & Lubman, D. I. (2008). Regional brain abnormalities associated with long-term heavy cannabis use. *Arch Gen Psychiatry*, *65*(6), 694-701. <https://doi.org/10.1001/archpsyc.65.6.694>
